# Supplementary figures and images for: Amplitude modulations of cortical sensory responses in pulsatile evidence accumulation
Source: eLife journal article supplement (doi:10.7554/elife.60628), 2020-12-02

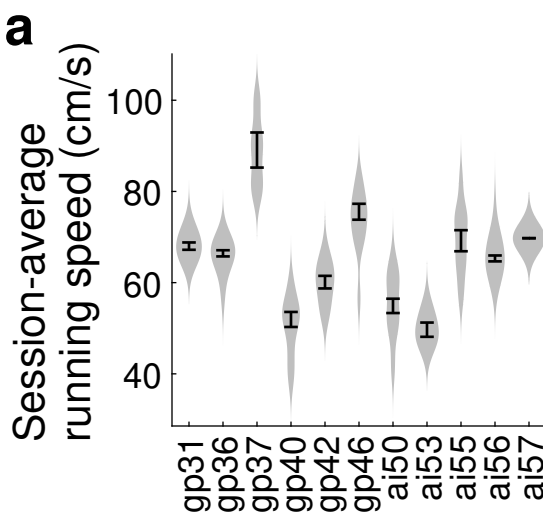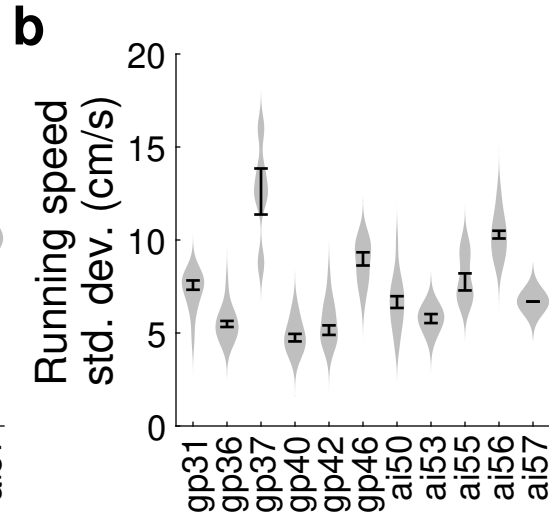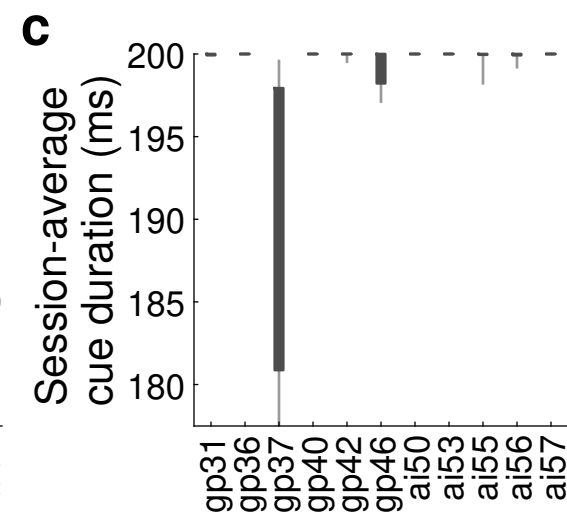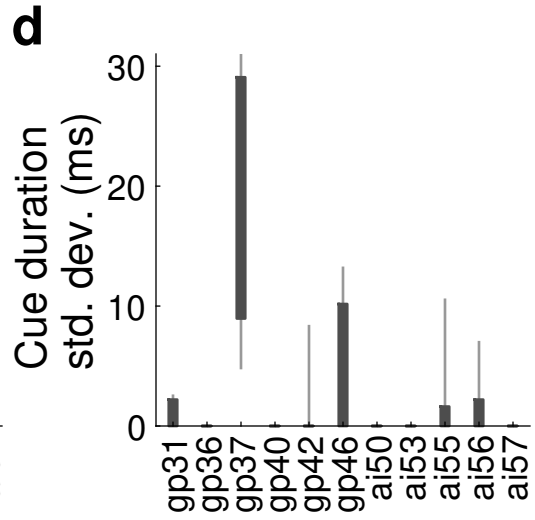

Supplement: supp [file elife-60628-supp-v1.zip]

Cells with SSA excluded

V1 / AM / PM / MMA / MMP / RSC

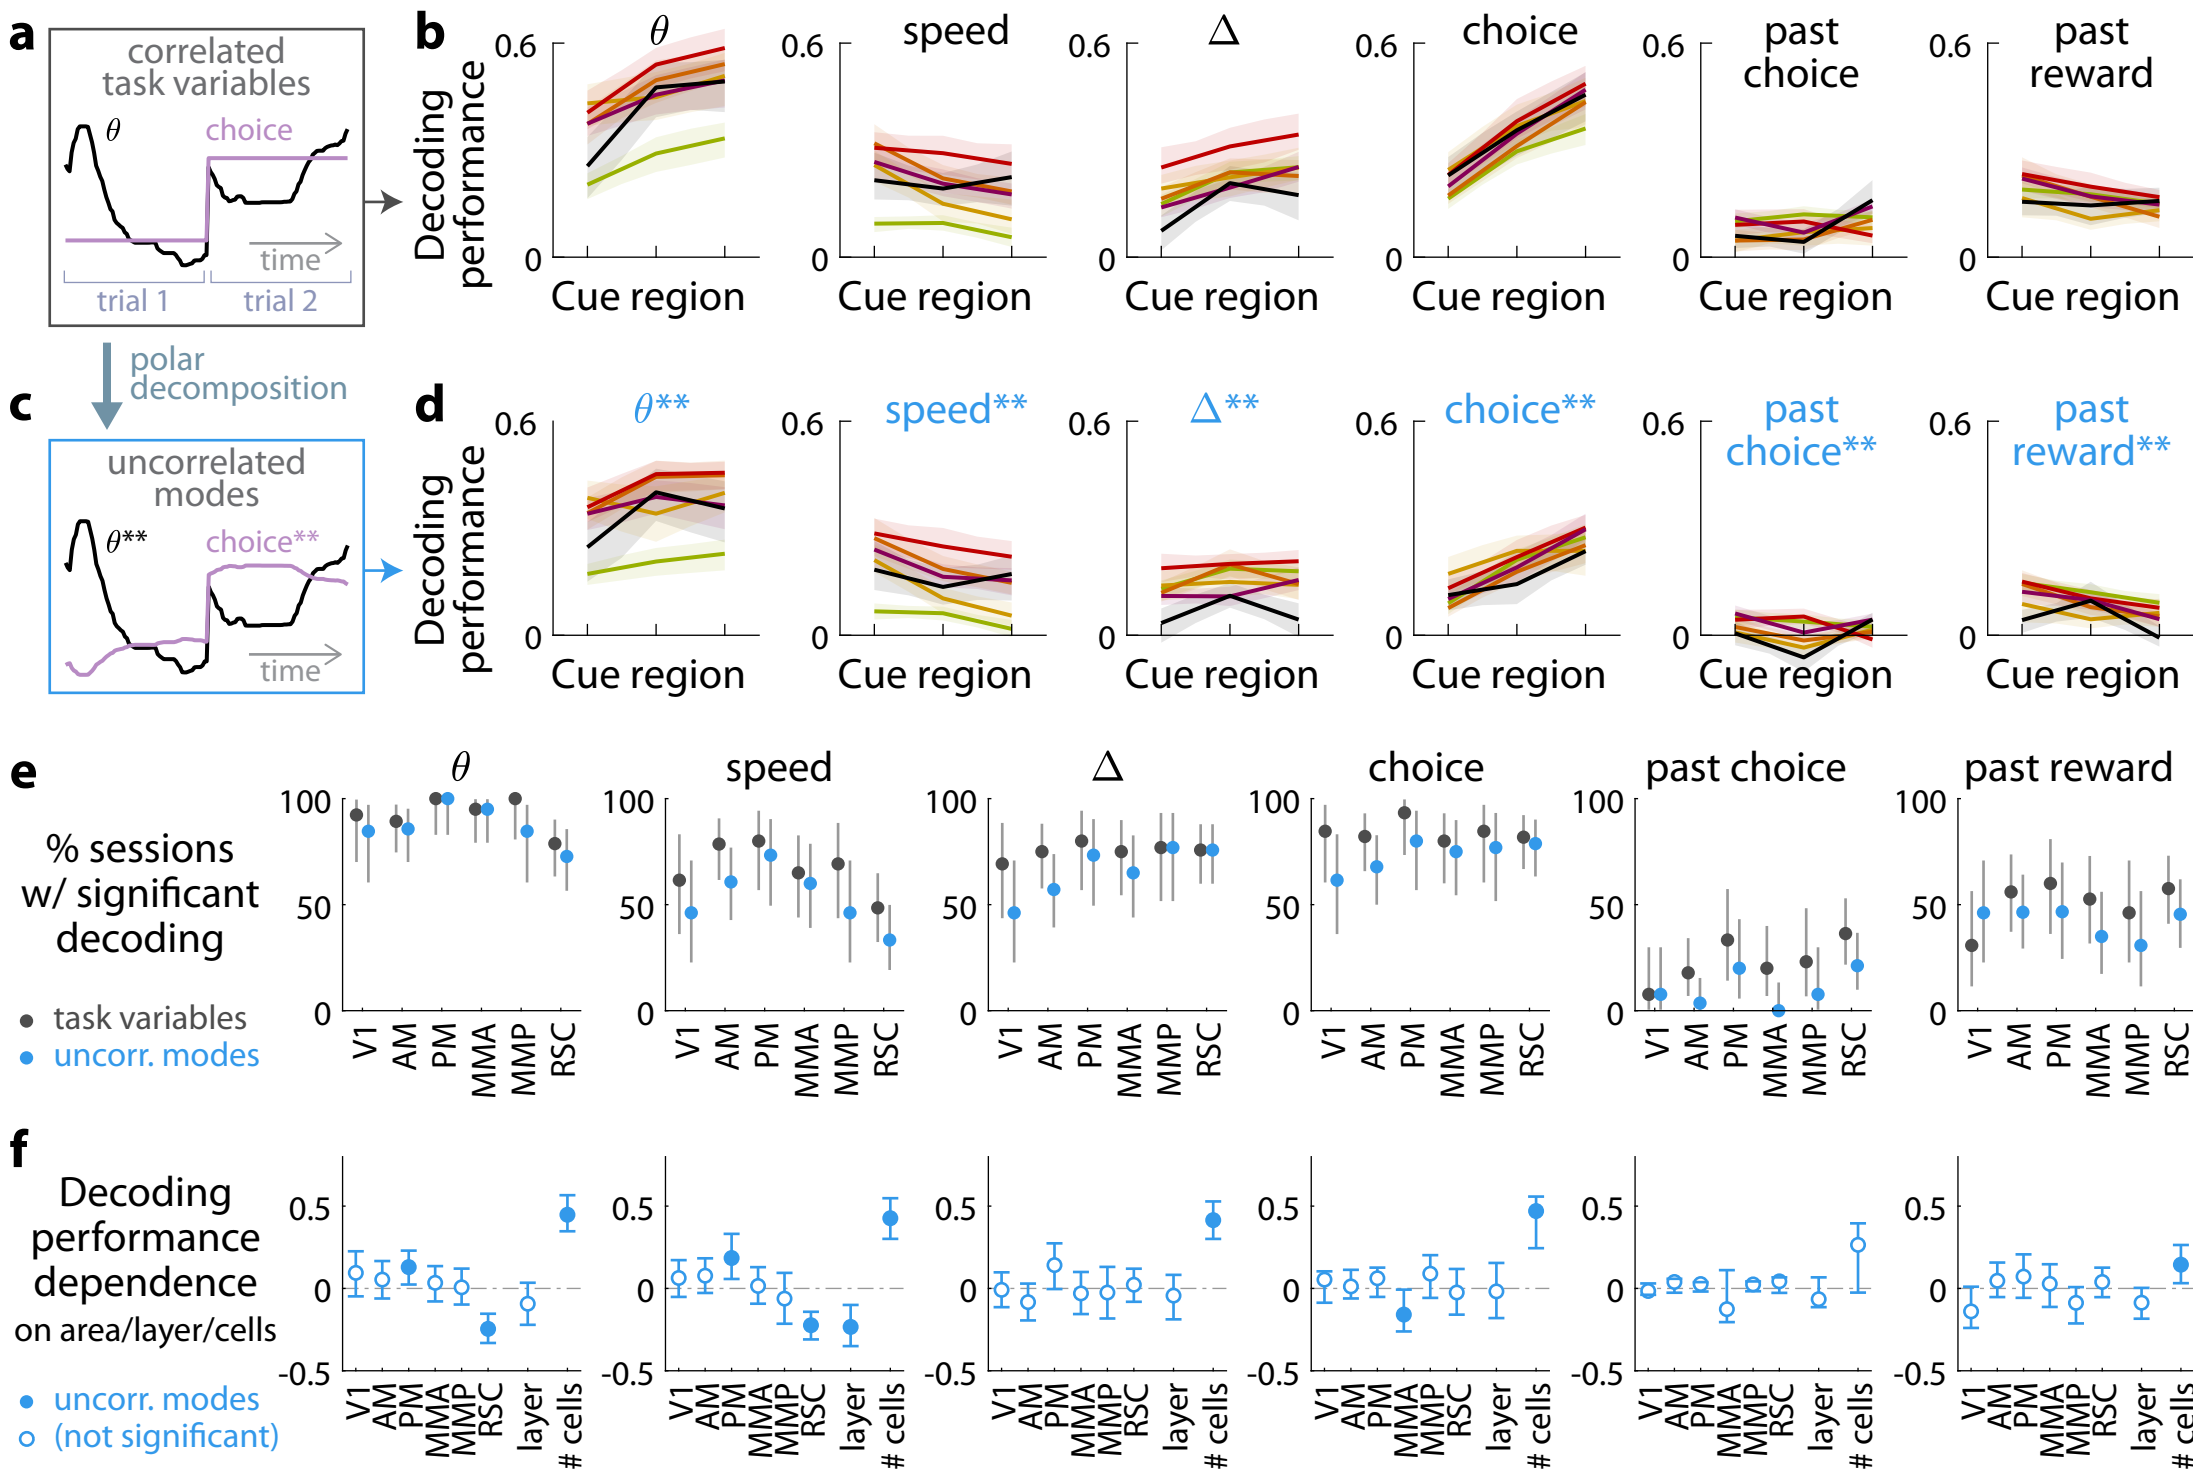

Supplement: supp [file elife-60628-supp-v1.zip]

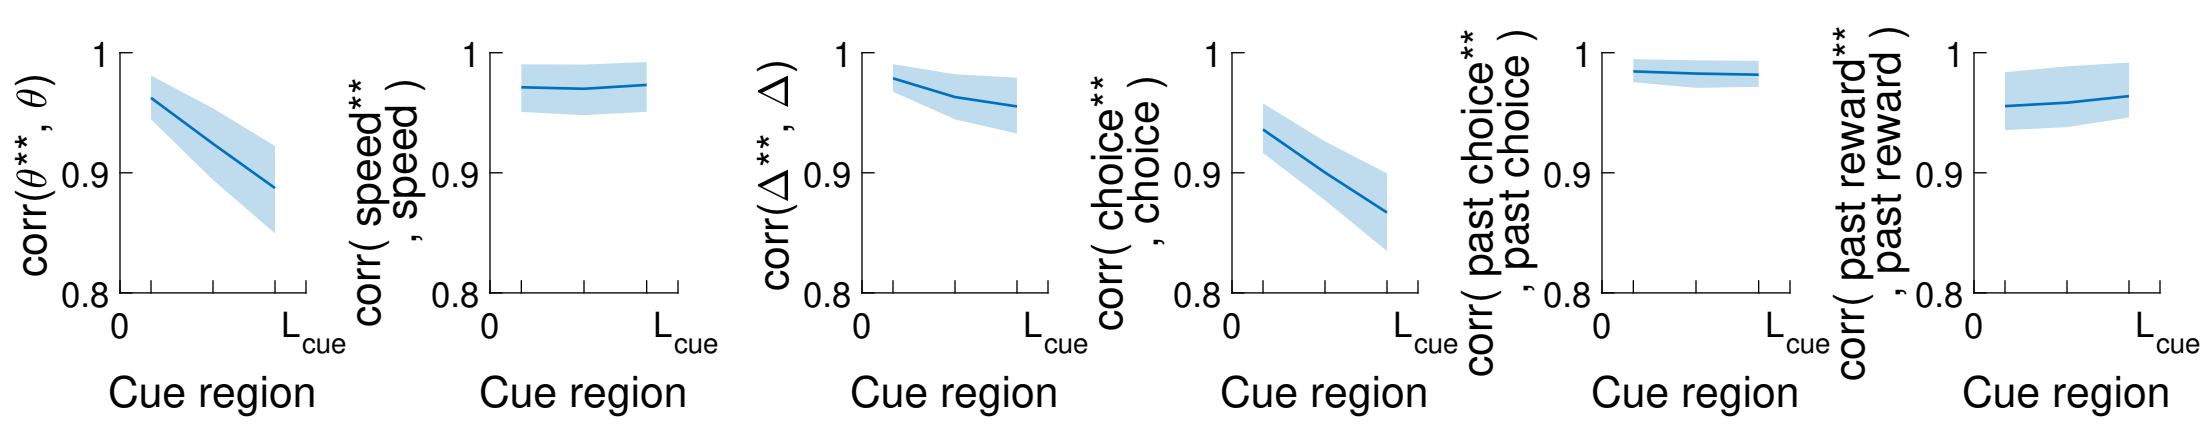

Supplement: supp [file elife-60628-supp-v1.zip]

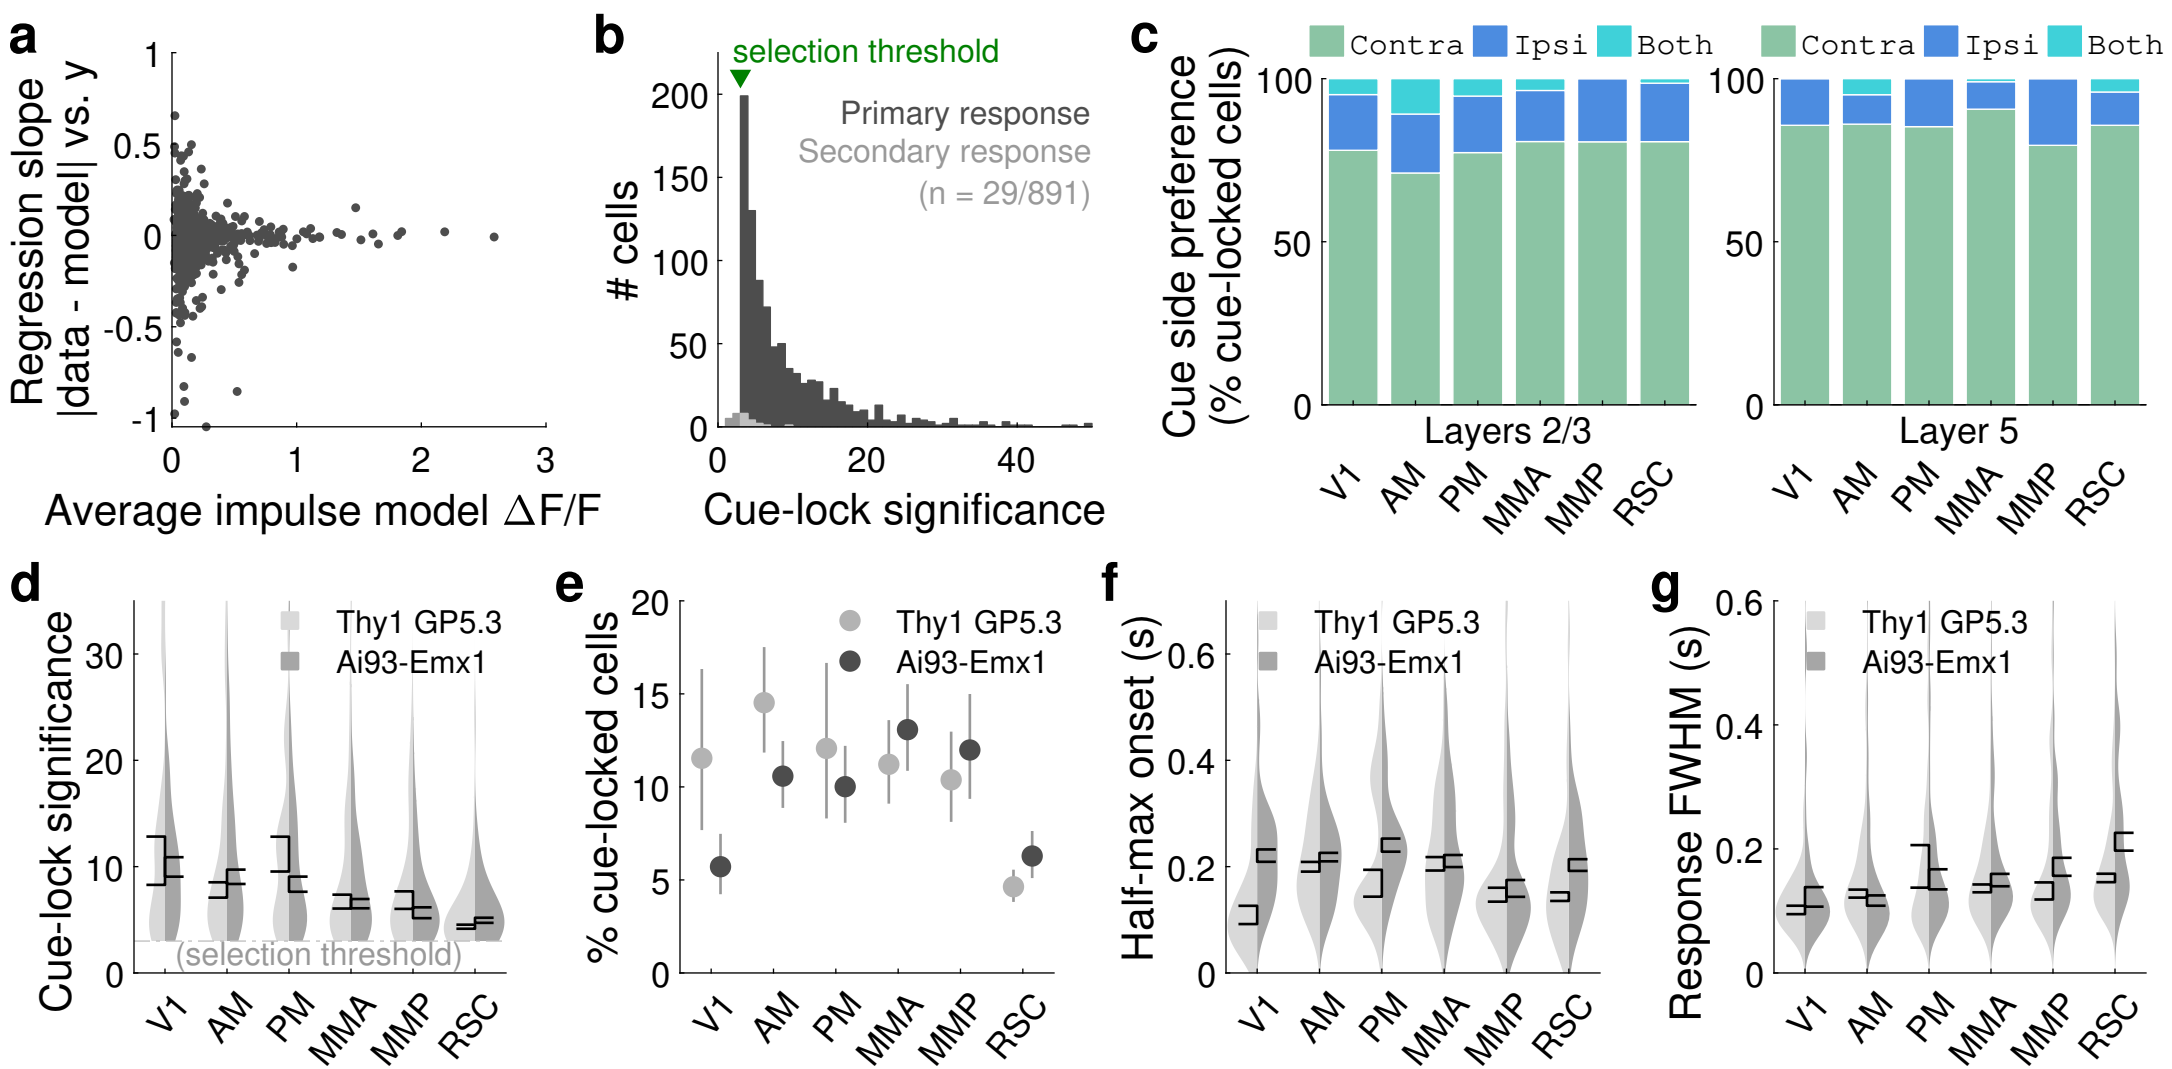

Supplement: supp [file elife-60628-supp-v1.zip]

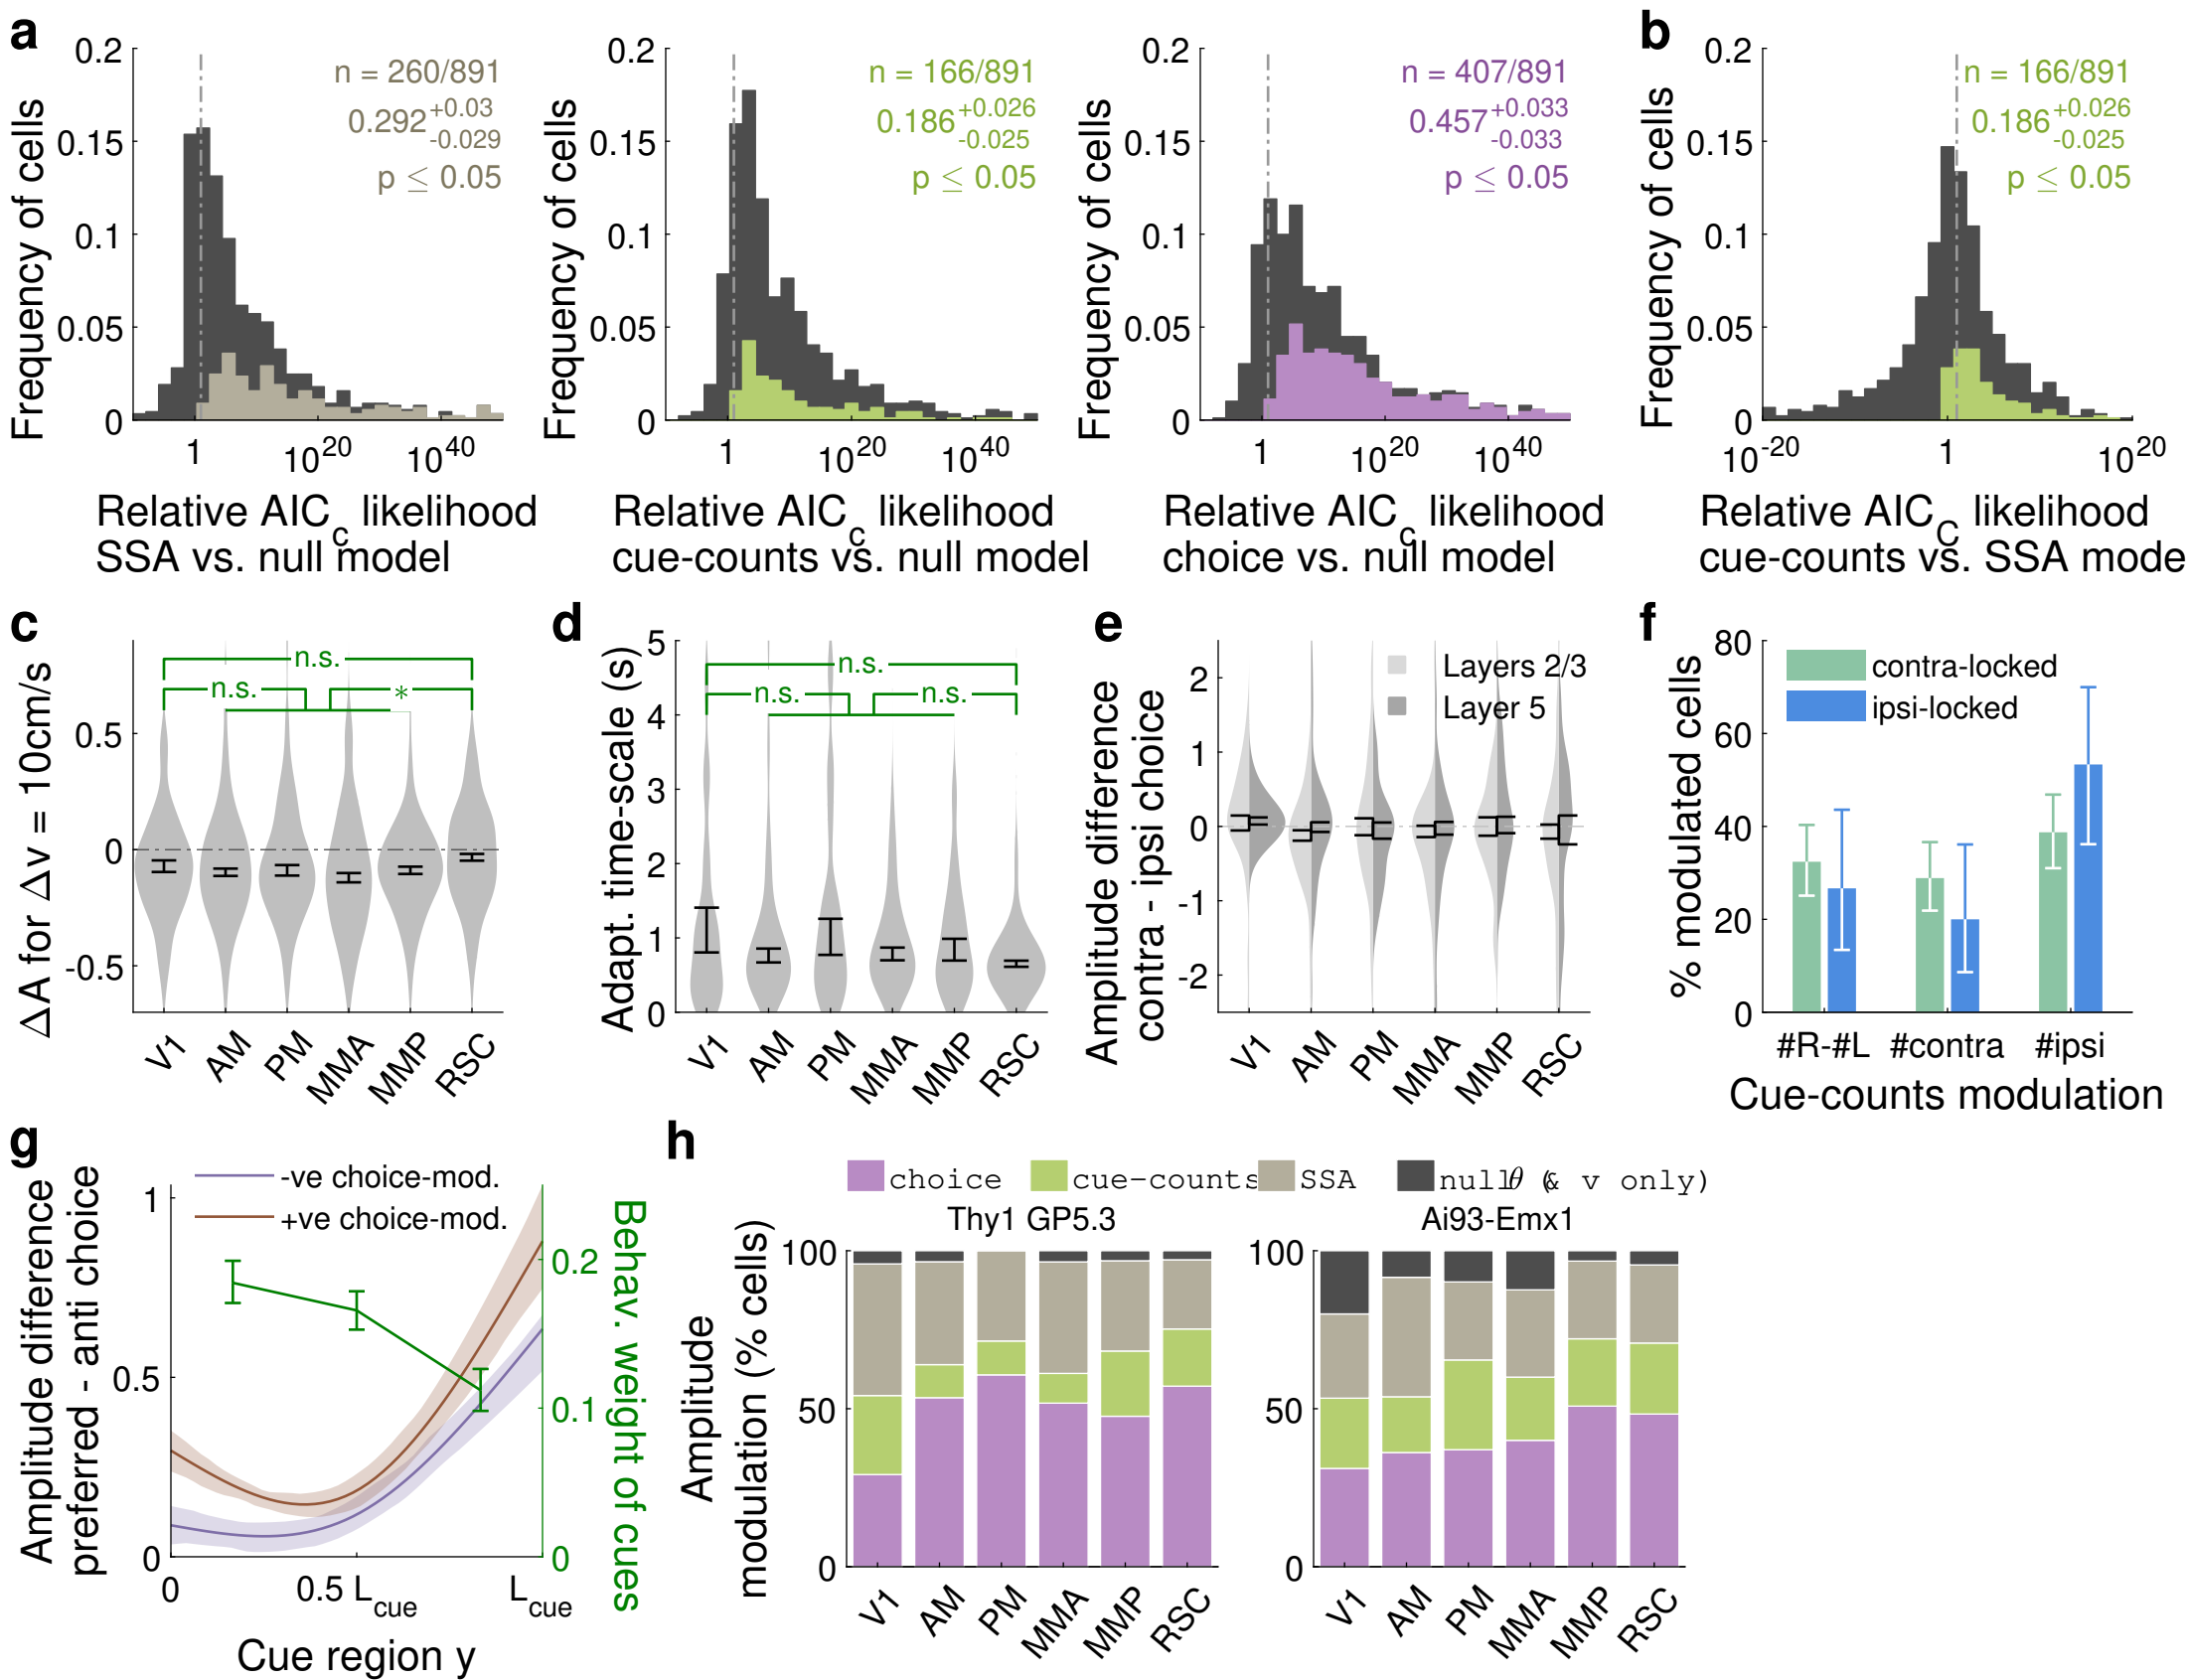

Supplement: supp [file elife-60628-supp-v1.zip]

**a** L cue-locked cell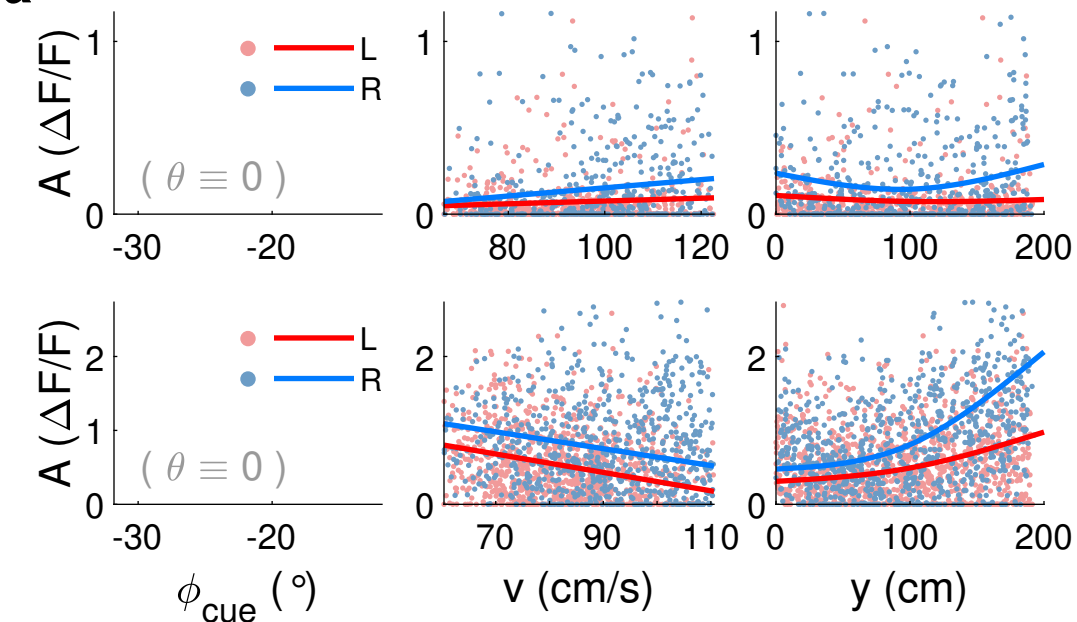**b** L cue-locked cell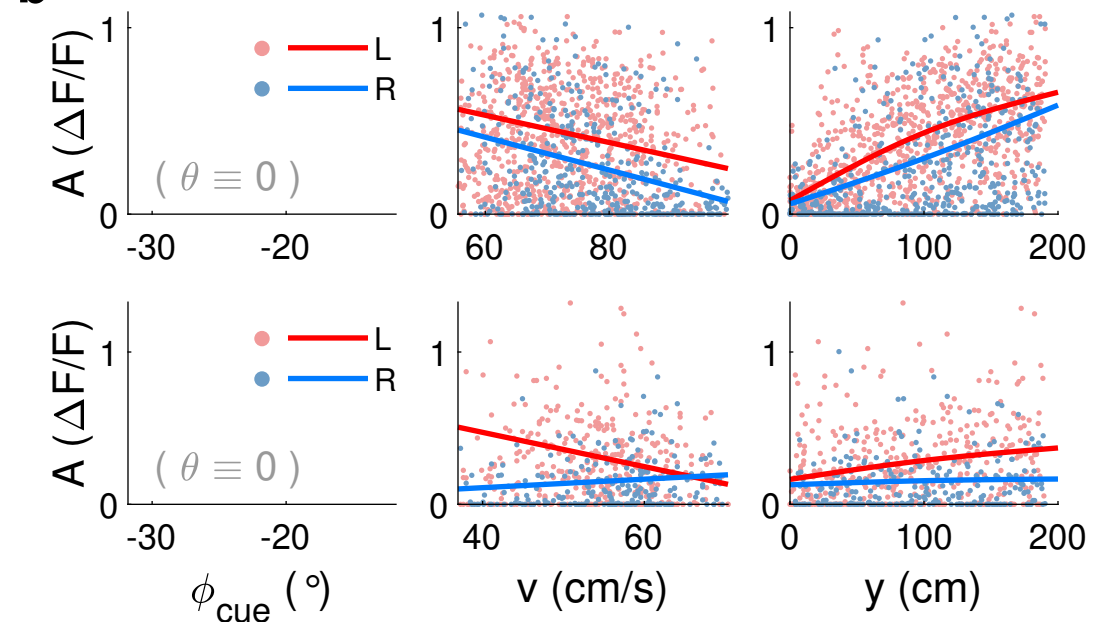**c**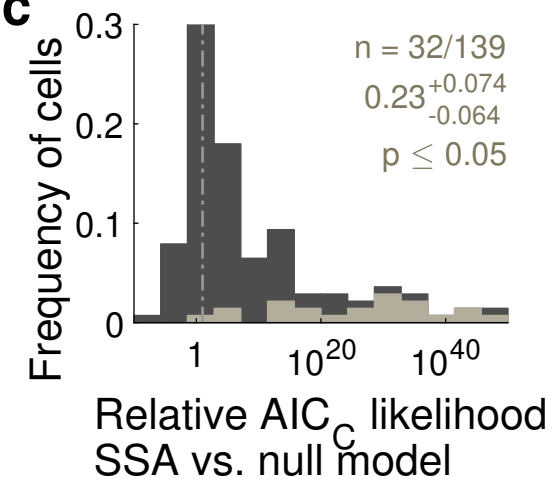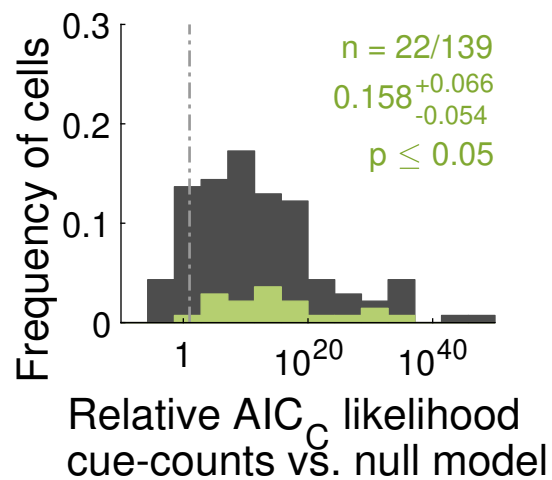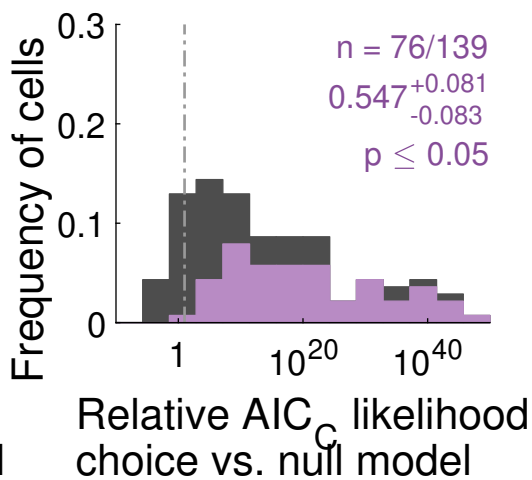**d**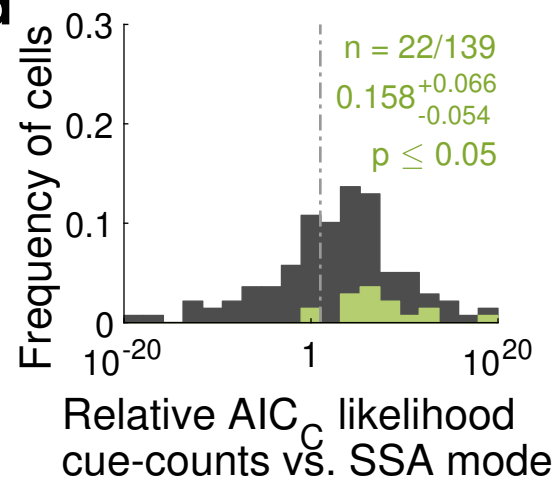**e**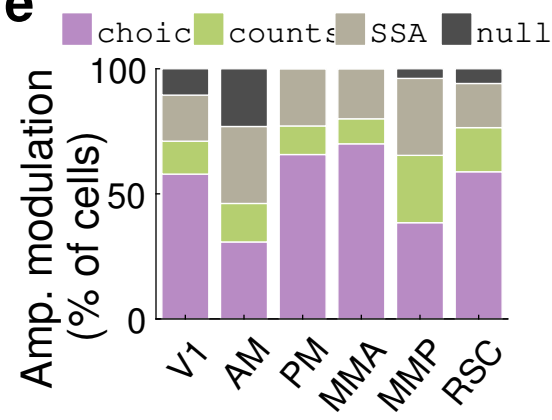**f**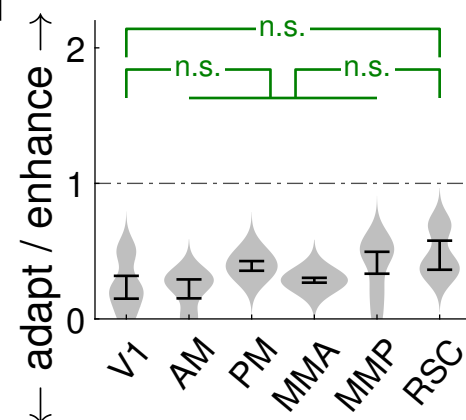**g**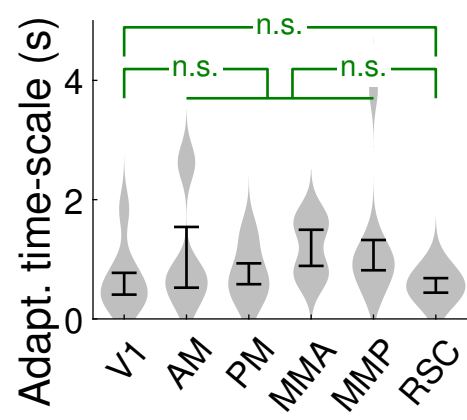

Supplement: supp [file elife-60628-supp-v1.zip]

V1 / AM / PM / MMA / MMP / RSC

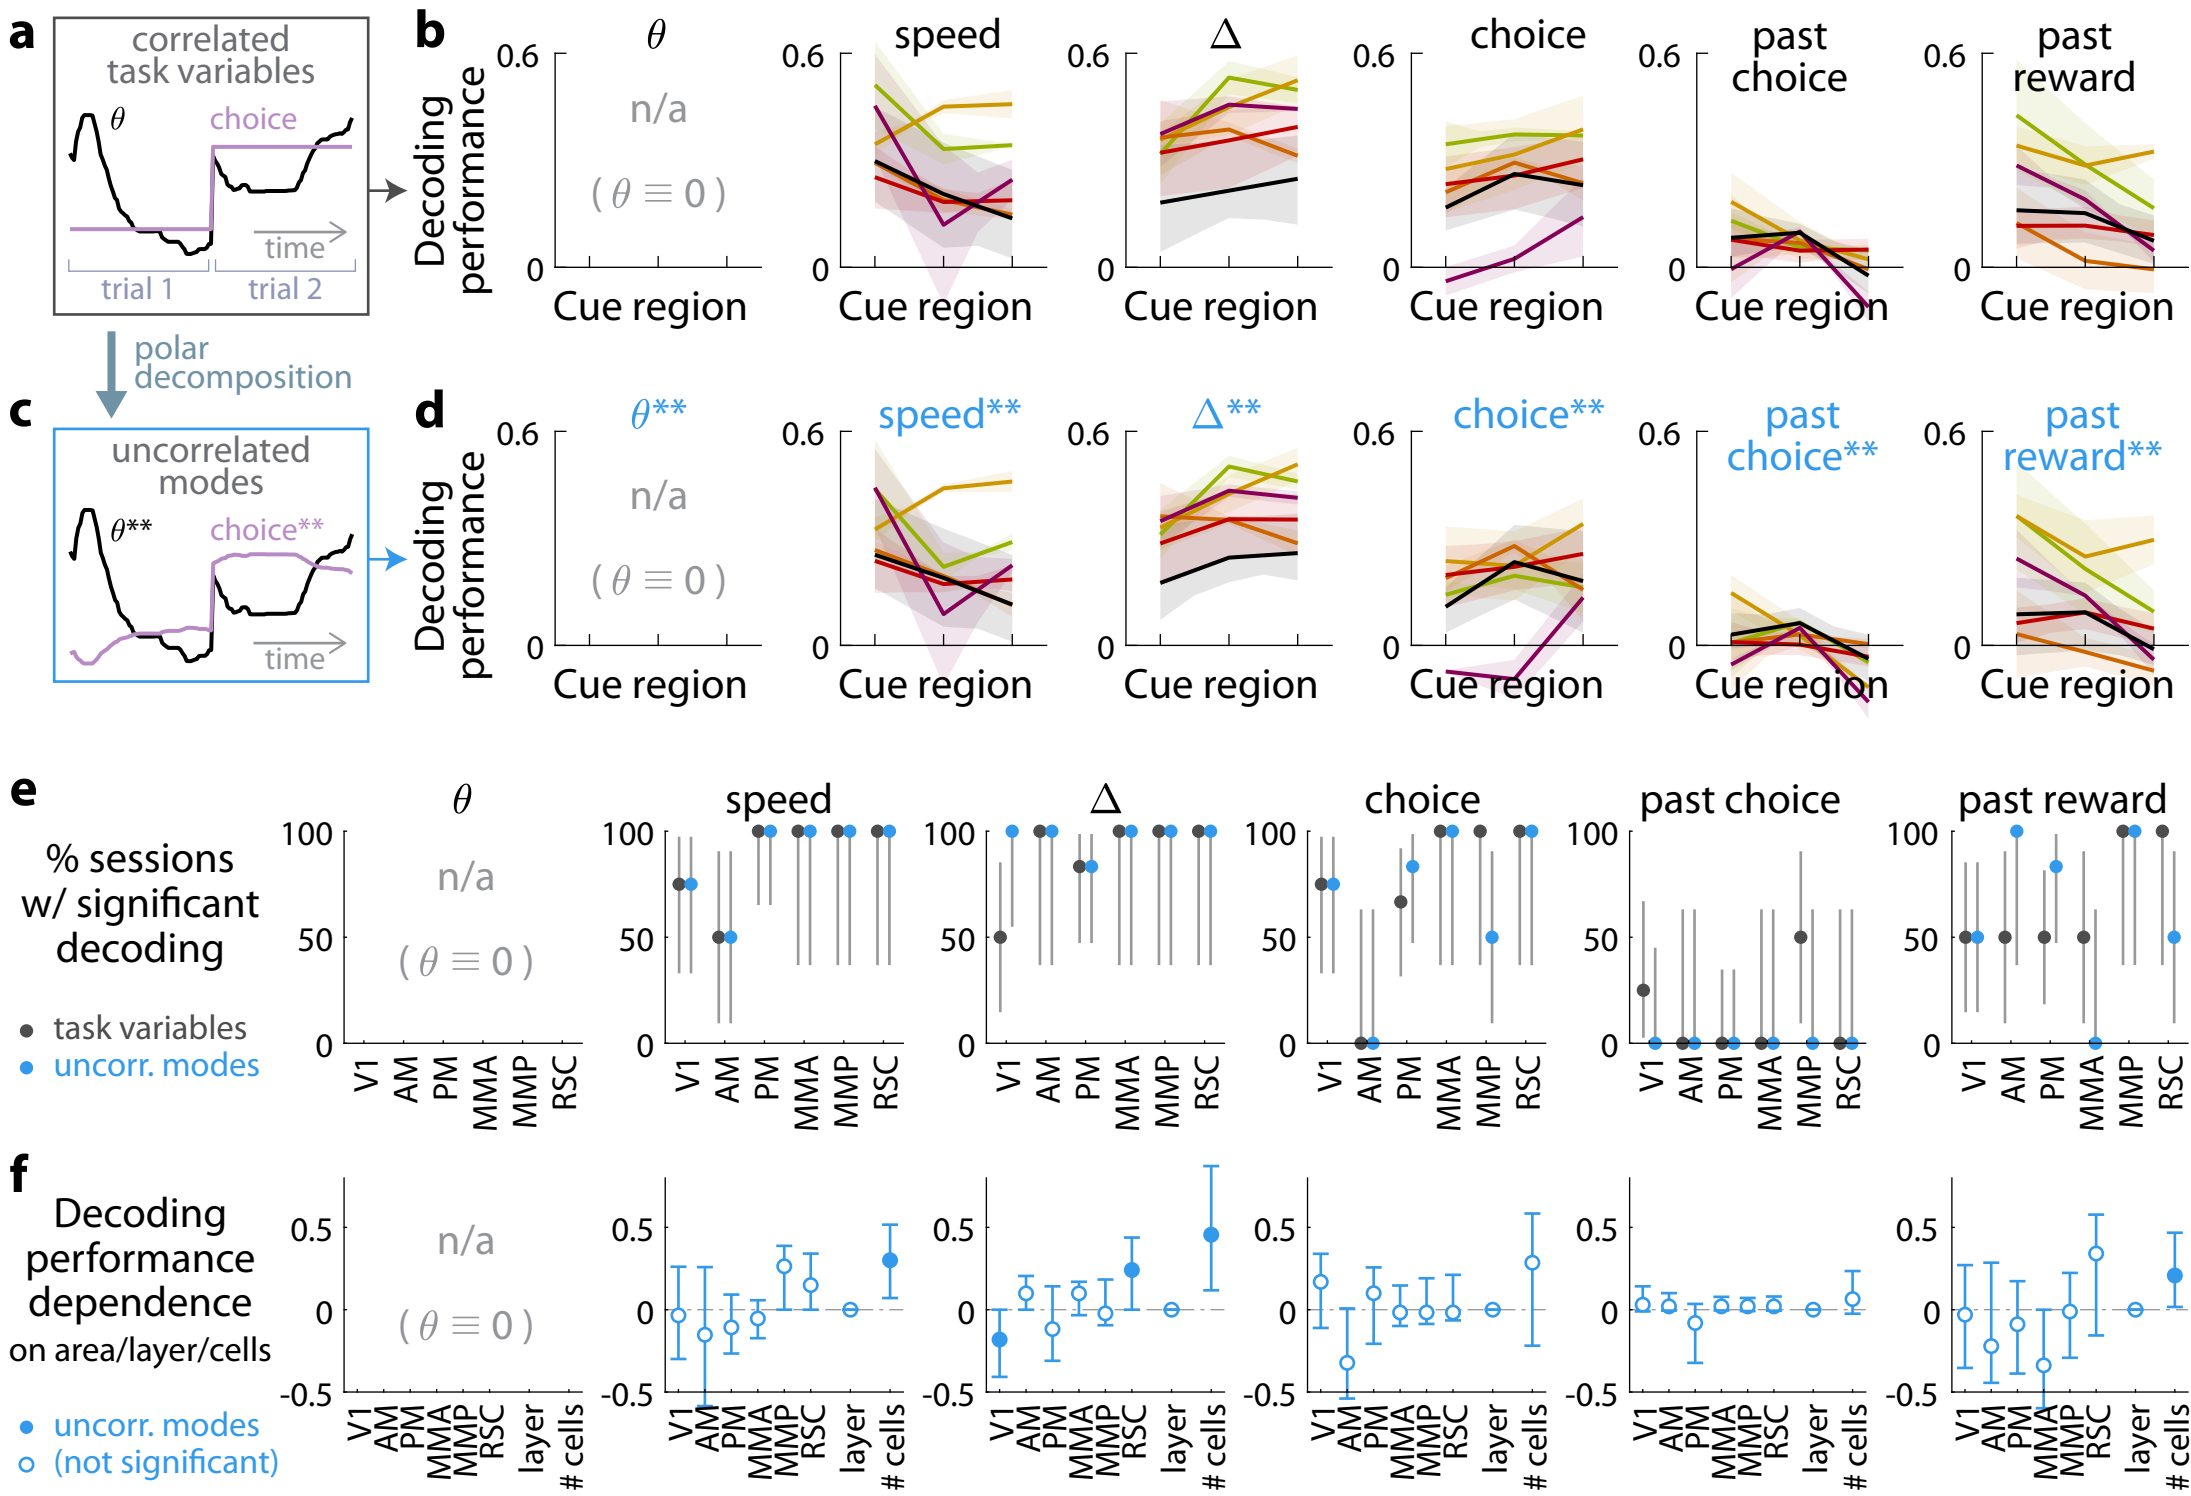

Supplement: supp [file elife-60628-supp-v1.zip]
